# Supplementary material for: Comprehensive Assignment of Roles for Salmonella Typhimurium Genes in Intestinal Colonization of Food-Producing Animals
Source: PLoS Genet. 2013 Apr 18;9(4):e1003456. doi: 10.1371/journal.pgen.1003456 (PMC3630085; doi:10.1371/journal.pgen.1003456)
Supplement: Table S4 — Fitness scores of mutants within sRNA genes annotated in the S. Typhimurium SL1344 genome. (XLSX) [file pgen.1003456.s009.xlsx]

## Sheet: Table S4
Molecule	Position	Orientation	Name	ChickFC	ChickP	PigFC	PigP	CalfFC	CalfP	MouseFC	MouseP
Chromosome	74902	-	DapZ							-1.07685	0.190096
Chromosome	94712	+	STnc470							-0.206696	0.917196
Chromosome	128753	-	SgrS							-0.284312	0.87316
Chromosome	338868	+	IsrA	-1.8034	0.425896	-5.72247	1.43e-07
Chromosome	339190	-	IsrA	-3.55892	0.000907003	-15	6.38e-05	-15	3.75e-26
Chromosome	807417	-	RybD	-0.899758	0.860314	-0.638436	0.609471	0.432786	0.572951
Chromosome	1060802	-	IsrB-2; IsrB-1	0.261529	0.970781			-1.09009	0.0379075
Chromosome	1286012	+	IsrC							0.800503	0.503964
Chromosome	1286147	+	IsrC	-0.536657	0.852858	-3.03762	0.00665628	0.421268	0.589992
Chromosome	1286161	+	IsrC	0.400646	0.947805			1.39217	0.0789809
Chromosome	1286163	+	IsrC	-0.664403	0.892808	0.504022	0.691564	0.58249	0.476989
Chromosome	1286173	+	IsrC	0.158091	0.9968	-1.22692	0.315962	0.686033	0.368445
Chromosome	1290593	+	STnc520	-4.71428	2.3e-05	-15	1.19e-07	-15	4.19e-71
Chromosome	1290622	+	STnc520	-4.67024	9.84e-06	-6.80377	5.52e-09	-15	6.98e-30
Chromosome	1309937	-	RyhB2							1.30063	0.128024
Chromosome	1407342	+	RydB	-5.5105	2.2e-05	-3.59579	0.0410459	-6.60096	7.62e-37
Chromosome	1643621	+	STnc1110							0.801998	0.478795
Chromosome	1662241	-	STnc1120							0.188835	0.945621
Chromosome	1702589	-	MicC							1.06255	0.27876
Chromosome	1925755	+	RyeA							-0.0168267	0.992668
Chromosome	1958661	+	RyeF							0.783376	0.723864
Chromosome	2133044	+	STnc1650							-0.00863729	0.997035
Chromosome	2223134	+	STnc1150							1.42293	0.0736566
Chromosome	2342522	+	IsrG							0.131817	0.970324
Chromosome	2392228	-	IsrH_1; IsrH_2	-3.77406	0.000488499	-15	1.8e-08	-15	2.22e-34
Chromosome	2392273	-	IsrH_1; IsrH_2	-2.20875	0.0612146	-3.59745	0.0244804	-15	2.22e-34
Chromosome	2672754	+	RyfA							-0.155704	0.942126
Chromosome	2729647	+	STnc1380	-0.127686	0.965891	-2.27794	0.0215916	-2.92647	7.68e-09
Chromosome	2759093	+	IsrI							0.446853	0.790799
Chromosome	2927662	+	IsrM							0.495102	0.810405
Chromosome	2927935	-	IsrM							0.422972	0.843929
Chromosome	2929626	+	IsrN							0.100044	0.976631
Chromosome	3067509	+	InvR	-15	3.22e-09	-15	1.84e-06	-15	1.22e-29
Chromosome	3138420	+	CsrB							-0.726914	0.481423
Chromosome	3191613	-	OmrA	0.606125	0.879226			0.0613165	0.93563
Chromosome	3242674	-	SsrS							-1.33942	0.775937
Chromosome	3242891	+	SsrS							-0.24701	0.900696
Chromosome	3383000	-	RygD							0.164289	0.971824
Chromosome	3412915	+	SraF							-15	0.485793
Chromosome	3412944	-	SraF							0.263104	0.917196
Chromosome	3511869	+	ArcZ							-0.687514	0.616068
Chromosome	3633267	+	STnc1590							1.72511	0.604156
Chromosome	3858796	+	STnc780							0.2085	0.934862
Chromosome	3858797	+	STnc780							-0.317623	0.853367
Chromosome	3858885	+	STnc780							0.140119	0.96348
Chromosome	3858948	+	STnc780	-0.775779	0.75766	-1.75811	0.136852	-2.32355	0.00057011
Chromosome	4019429	-	IstR-1,2							0.359075	0.945292
Chromosome	4072480	-	STnc400							0.874344	0.419498
Chromosome	4231601	+	CsrC							-0.671283	0.542824
Chromosome	4231729	-	CsrC							-0.547443	0.670228
Chromosome	4231731	-	CsrC	0.924441	0.961166	1.40269	0.550377	0.423552	0.626563
Chromosome	4356657	+	STnc1600							-0.0136398	0.992668
Chromosome	4475795	+	STnc2130							-0.273606	0.926193
Chromosome	4475818	-	STnc2130	1.18939	0.625896	1.25087	0.570462	-0.350876	0.666721
Chromosome	4475855	-	STnc2130							0.298612	0.88874
Chromosome	4486811	-	STnc880							0.199988	0.942266
Chromosome	4580494	+	STnc440							-0.116334	0.962705
Chromosome	4580502	-	STnc440	-1.08688	0.557094	-3.9669	1.78e-05	-5.55389	4.02e-13
Chromosome	4683638	-	STnc2160	-5.94822	1.49e-07	-15	4.97e-08	-15	1.51e-33
Chromosome	4783618	+	IsrQ							0.00424805	1
